# Supplementary material for: miR-543 regulates high glucose-induced fibrosis and autophagy in diabetic nephropathy by targeting TSPAN8
Source: Springer Nature journal article supplement (doi:10.1186/s12882-022-02716-8), 2022-03-04
Supplement: MOESM3 [file 20193406]

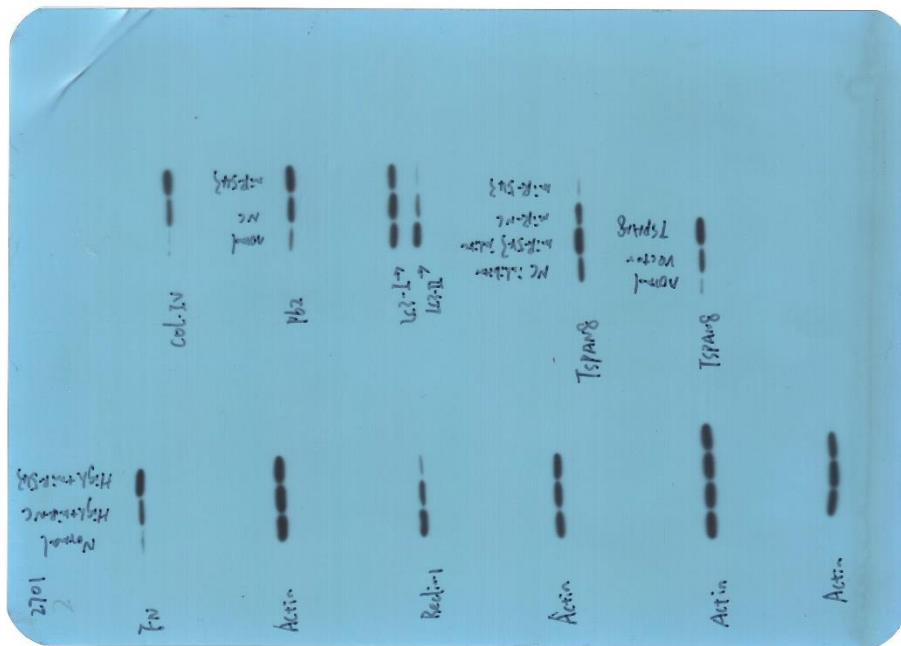

Full scan of Western blot analysis membrane of FN, Col.IV, LC3-I, LC3-II, Beclin-1, p62 and TSPAN8 using actin as the internal control
